# Supplementary material for: Exploratory Analysis of the Copy Number Alterations in Glioblastoma Multiforme
Source: PLoS One. 2008 Dec 30;3(12):e4076. doi: 10.1371/journal.pone.0004076 (PMC2605252; doi:10.1371/journal.pone.0004076)
Supplement: Table S2 — Genes within low-entropy regions (0.05 MB XLS) [file pone.0004076.s024.xls]

## Sheet: Plan1
	Start	End	Gene Name*	Start	End	Product*
1	4028404	6333694	AJAP1	4614964	4743710	adherens junctions associated protein 133
1	4028404	6333694	NPHP4	5845456	5975117	nephronophthisis 4
1	4028404	6333694	KCNAB2	6008966	6083109	potassium voltage-gated channel, shaker-related subfamily, beta member 2
1	4028404	6333694	CHD5	6084439	6162769	chromodomain helicase DNA binding protein 5
1	4028404	6333694	RPL22	6167666	6182265	ribosomal protein L22
1	4028404	6333694	RNF207	6188775	6203945	ring finger protein 207
1	4028404	6333694	ICMT	6203839	6218630	isoprenylcysteine carboxyl methyltransferase
1	4028404	6333694	HES3	6226848	6228224	hairy and enhancer of split 3 (Drosophila)
1	4028404	6333694	GPR153	6231442	6243621	G protein-coupled receptor 153
1	4028404	6333694	ACOT7	6246918	6376412	acyl-CoA thioesterase 7
1	7728761	7742417	CAMTA1	6767970	7752350	calmodulin binding transcription activator 12
1	7889543	7926197	TNFRSF9	7902493	7923473	tumor necrosis factor receptor superfamily, member 9
1	50961735	51283220	FAF1	50679522	51198523	Fas (TNFRSF6) associated factor 121
1	50961735	51283220	CDKN2C	51206954	51212896	cyclin-dependent kinase inhibitor 2C (p18, inhibits CDK4)
1	200622685	200786311	PPP1R12B	200584458	200824319	protein phosphatase 1, regulatory (inhibitor) subunit 12B
1	201942811	203355851	ATP2B4	201862550	201979831	ATPase, Ca++ transporting, plasma membrane 4
1	201942811	203355851	LAX1	202000959	202012122	lymphocyte transmembrane adaptor 129
1	201942811	203355851	ZC3H11A	202031373	202089878	zinc finger CCCH-type containing 11A
1	201942811	203355851	SNRPE	202097362	202106902	small nuclear ribonucleoprotein polypeptide E
1	201942811	203355851	C1orf157	202268197	202277010	chromosome 1 open reading frame 157
1	201942811	203355851	SOX13	202308868	202363493	SRY (sex determining region Y)-box 13
1	201942811	203355851	ETNK2	202366813	202387644	ethanolamine kinase 2
1	201942811	203355851	REN	202390570	202402087	renin
1	201942811	203355851	KISS1	202426091	202432241	KiSS-1 metastasis-suppressor
1	201942811	203355851	GOLT1A	202433910	202449842	golgi transport 1 homolog A (S. cerevisiae)
1	201942811	203355851	PLEKHA6	202454603	202595666	pleckstrin homology domain containing, family A member 6
1	201942811	203355851	PPP1R15B	202639142	202647541	protein phosphatase 1, regulatory (inhibitor) subunit 15B
1	201942811	203355851	PIK3C2B	202658383	202726096	phosphoinositide-3-kinase, class 2, beta polypeptide
1	201942811	203355851	MDM4	202752133	202786348	Mdm4, transformed 3T3 cell double minute 4, p53 binding protein (mouse)
1	201942811	203355851	LRRN2	202852923	202921219	leucine rich repeat neuronal 2
1	201942811	203355851	NFASC	203064445	203258571	neurofascin homolog (chicken)
1	201942811	203355851	CNTN2	203278962	203313760	contactin 2 (axonal)
1	201942811	203355851	TMEM81	203318879	203320210	transmembrane protein 812
1	201942811	203355851	RBBP5	203322601	203357753	retinoblastoma binding protein 5
2	24426149	24551934	ITSN2	24279238	24436880	intersectin 2
2	24616100	24712348	NCOA1	24660849	24847074	nuclear receptor coactivator 118
2	202864197	203906650	NOP5/NOP58	202838759	202876628	nucleolar protein NOP5/NOP58
2	202864197	203906650	BMPR2	202949915	203140718	bone morphogenetic protein receptor, type II (serine/threonine kinase)
2	202864197	203906650	ALS2CR13	203208455	203342724	amyotrophic lateral sclerosis 2 (juvenile) chromosome region, candidate 13
2	202864197	203906650	ICA1L	203346117	203444615	islet cell autoantigen 1,69kDa-like
2	202864197	203906650	WDR12	203453574	203484638	WD repeat domain 12
2	202864197	203906650	ALS2CR8	203485222	203559304	amyotrophic lateral sclerosis 2 (juvenile) chromosome region, candidate 8
2	202864197	203906650	NBEAL1	203708717	203790961	neurobeachin-like 118
2	202864197	203906650	CYP20A1	203811408	203878807	cytochrome P450, family 20, subfamily A, polypeptide 118
2	202864197	203906650	ABI2	203901247	204005136	abl interactor 2
3	106776838	106776898	ALCAM	106568402	106778433	activated leukocyte cell adhesion molecule
4	39131124	39168967	RPL9	39132138	39136962	ribosomal protein L9
4	39131124	39168967	LIAS	39137059	39155667	lipoic acid synthetase
4	39704302	39820710	N4BP2	39775241	39833422	NEDD4 binding protein 2
4	53634367	53662412	SCFD2	53433905	53926998	sec1 family domain containing 2
4	53686668	57090231	FIP1L1	53938619	54020598	FIP1 like 1 (S. cerevisiae)
4	53686668	57090231	LNX1	54020224	54119123	ligand of numb-protein X 130
4	53686668	57090231	LOC402176	54546409	54548201	similar to 60S ribosomal protein L21
4	53686668	57090231	CHIC2	54570712	54625544	cysteine-rich hydrophobic domain 2
4	53686668	57090231	GSX2	54660954	54662878	GS homeobox 2
4	53686668	57090231	PDGFRA	54790203	54859168	platelet-derived growth factor receptor, alpha polypeptide
4	53686668	57090231	KIT	55218851	55301637	v-kit Hardy-Zuckerman 4 feline sarcoma viral oncogene homolog
4	53686668	57090231	KDR	55639405	55686518	kinase insert domain receptor (a type III receptor tyrosine kinase)
4	53686668	57090231	SRD5A3	55907165	55932234	steroid 5 alpha-reductase 3
4	53686668	57090231	TMEM165	55957113	55987098	transmembrane protein 165
4	53686668	57090231	CLOCK	55993416	56107753	clock homolog (mouse)
4	53686668	57090231	PDCL2	56117448	56153135	phosducin-like 2
4	53686668	57090231	NMU	56156154	56197221	neuromedin U
4	53686668	57090231	EXOC1	56414572	56466000	exocyst complex component 118
4	53686668	57090231	CEP135	56509793	56594283	centrosomal protein 135kDa
4	53686668	57090231	KIAA1211	56731117	56891646	KIAA1211 protein
4	53686668	57090231	AASDH	56899212	56948394	aminoadipate-semialdehyde dehydrogenase
4	53686668	57090231	PPAT	56954284	56996601	phosphoribosyl pyrophosphate amidotransferase
4	53686668	57090231	PAICS	56996671	57022290	phosphoribosylaminoimidazole carboxylase, phosphoribosylaminoimidazole succinocarboxamide synthetase
4	53686668	57090231	SRP72	57028518	57064603	signal recognition particle 72kDa
4	53686668	57090231	ARL9	57066131	57084814	ADP-ribosylation factor-like 9
7	4042680	4049132	SDK1	3307605	4275157	sidekick homolog 1, cell adhesion molecule (chicken)
7	32978614	32991778	FKBP9	32963576	33013066	FK506 binding protein 9, 63 kDa
7	54027966	55983910	VSTM2A	54577512	54604441	V-set and transmembrane domain containing 2A
7	54027966	55983910	SEC61G	54787433	54794432	Sec61 gamma subunit
7	54027966	55983910	EGFR	55054218	55242524	epidermal growth factor receptor (erythroblastic leukemia viral (v-erb-b) oncogene homolog, avian)
7	54027966	55983910	LANCL2	55400634	55468928	LanC lantibiotic synthetase component C-like 2 (bacterial)
7	54027966	55983910	ECOP	55505799	55607693	EGFR-coamplified and overexpressed protein
7	54027966	55983910	SEPT14	55828730	55897975	septin 14
7	54027966	55983910	ZNF713	55947824	55975926	zinc finger protein 713
7	152135252	152147233	ACTR3B	152087783	152183395	ARP3 actin-related protein 3 homolog B (yeast)
8	67783070	68062986	SGK3	67787444	67936810	serum/glucocorticoid regulated kinase family, member 3
8	67783070	68062986	C8orf45	67948883	67976569	chromosome 8 open reading frame 45
8	67783070	68062986	LOC286187	68062919	68103339	similar to RIKEN cDNA 1700011J18
8	113318761	113362695	CSMD3	113304332	114518417	CUB and Sushi multiple domains 3
9	20336123	24769734	MLLT3	20334967	20612513	myeloid/lymphoid or mixed-lineage leukemia (trithorax homolog, Drosophila); translocated to, 3
9	20336123	24769734	KIAA1797	20648308	20985953	KIAA1797
9	20336123	24769734	PTPLAD2	20996364	21021634	protein tyrosine phosphatase-like A domain containing 2
9	20336123	24769734	IFNB1	21067103	21067942	interferon, beta 1, fibroblast
9	20336123	24769734	IFNW1	21130630	21132143	interferon, omega 14
9	20336123	24769734	IFNA21	21155635	21156618	interferon, alpha 2129
9	20336123	24769734	IFNA4	21176692	21177669	interferon, alpha 4
9	20336123	24769734	IFNA7	21191467	21192203	interferon, alpha 7
9	20336123	24769734	IFNA10	21196179	21197141	interferon, alpha 10
9	20336123	24769734	IFNA16	21206371	21207309	interferon, alpha 16
9	20336123	24769734	IFNA17	21217241	21218220	interferon, alpha 17
9	20336123	24769734	IFNA14	21229000	21229989	interferon, alpha 14									2	85806436	85899917	1	ATOH8	85834530	85868699	atonal homolog 8 (Drosophila)
9	20336123	24769734	IFNA5	21294685	21295254	interferon, alpha 5
9	20336123	24769734	KLHL9	21321017	21325428	kelch-like 9 (Drosophila)
9	20336123	24769734	IFNA6	21340316	21340885	interferon, alpha 6
9	20336123	24769734	IFNA13	21357422	21358074	interferon, alpha 13
9	20336123	24769734	IFNA2	21374253	21375395	interferon, alpha 2
9	20336123	24769734	IFNA8	21399145	21400183	interferon, alpha 8
9	20336123	24769734	IFNA1	21430439	21431314	interferon, alpha 129
9	20336123	24769734	IFNE1	21470837	21472311	interferon epsilon 122
9	20336123	24769734	MTAP	21792634	21855969	methylthioadenosine phosphorylase
9	20336123	24769734	CDKN2A	21957750	21984489	cyclin-dependent kinase inhibitor 2A (melanoma, p16, inhibits CDK4)
9	20336123	24769734	CDKN2B	21992901	21999311	cyclin-dependent kinase inhibitor 2B (p15, inhibits CDK4)
9	20336123	24769734	DMRTA1	22436839	22442471	DMRT-like family A132
9	20336123	24769734	ELAVL2	23680101	23816062	ELAV (embryonic lethal, abnormal vision, Drosophila)-like 2 (Hu antigen B)
10	89545841	89680005	ATAD1	89502854	89567896	ATPase family, AAA domain containing 110
10	89545841	89680005	PTEN	89613174	89718511	phosphatase and tensin homolog (mutated in multiple advanced cancers 1)
12	56097914	56851736	INHBC	56114809	56130875	inhibin, beta C
12	56097914	56851736	INHBE	56135362	56138057	inhibin, beta E
12	56097914	56851736	GLI1	56140200	56152311	glioma-associated oncogene homolog 1 (zinc finger protein)
12	56097914	56851736	ARHGAP9	56152304	56159899	Rho GTPase activating protein 9
12	56097914	56851736	MARS	56168117	56196699	methionyl-tRNA synthetase
12	56097914	56851736	DDIT3	56196637	56200566	DNA-damage-inducible transcript 3
12	56097914	56851736	MBD6	56202925	56210197	methyl-CpG binding domain protein 6
12	56097914	56851736	DCTN2	56210360	56227244	dynactin 2 (p50)
12	56097914	56851736	KIF5A	56230113	56264820	kinesin family member 5A
12	56097914	56851736	PIP4K2C	56271323	56283297	phosphatidylinositol-5-phosphate 4-kinase, type II, gamma
12	56097914	56851736	DTX3	56284870	56289849	deltex 3 homolog (Drosophila)
12	56097914	56851736	GEFT	56291484	56297292	RhoA/RAC/CDC42 exchange factor
12	56097914	56851736	SLC26A10	56299959	56306200	solute carrier family 26, member 10
12	56097914	56851736	B4GALNT1	56305817	56313251	beta-1,4-N-acetyl-galactosaminyl transferase 132
12	56097914	56851736	OS9	56374152	56401606	amplified in osteosarcoma
12	56097914	56851736	CENTG1	56405260	56422206	centaurin, gamma 17
12	56097914	56851736	TSPAN31	56425050	56428292	tetraspanin 317
12	56097914	56851736	CDK4	56428269	56432430	cyclin-dependent kinase 4
12	56097914	56851736	MARCH9	56435166	56439955	membrane-associated ring finger (C3HC4) 9
12	56097914	56851736	CYP27B1	56442383	56447242	cytochrome P450, family 27, subfamily B, polypeptide 132
12	56097914	56851736	METTL1	56448520	56452601	methyltransferase like 129
12	56097914	56851736	FAM119B	56452649	56462590	family with sequence similarity 119, member B
12	56097914	56851736	TSFM	56462825	56476783	Ts translation elongation factor, mitochondrial
12	56097914	56851736	AVIL	56477709	56496118	advillin
12	56097914	56851736	CTDSP2	56499976	56527013	CTD (carboxy-terminal domain, RNA polymerase II, polypeptide A) small phosphatase 2
12	56097914	56851736	XRCC6BP1	56621711	56637318	XRCC6 binding protein 132
12	67315903	67981156	RAP1B	67290918	67340640	RAP1B, member of RAS oncogene family
12	67315903	67981156	NUP107	67366997	67422739	nucleoporin 107kDa
12	67315903	67981156	SLC35E3	67426202	67446119	solute carrier family 35, member E3
12	67315903	67981156	MDM2	67488246	67520480	Mdm2, transformed 3T3 cell double minute 2, p53 binding protein (mouse)
12	67315903	67981156	CPM	67531221	67643286	carboxypeptidase M
12	67315903	67981156	CPSF6	67919666	67951289	cleavage and polyadenylation specific factor 6, 68kDa
17	26438606	26453055	NF1	26446120	26728820	neurofibromin 1 (neurofibromatosis, von Recklinghausen disease, Watson disease)
17	28797037	29337463	ACCN1	28364217	29507937	amiloride-sensitive cation channel 1, neuronal (degenerin)
	*information from NCBI
